# Supplementary material
Source: MDPI journal article supplement (https://www.mdpi.com/2072-4292/6/12/12708)
Supplement: s1 [file s1]

*Supplementary Information***Aladdin's Magic Lamp: Active Target Calibration of the DMSP OLS. *Remote Sens.* 2014, 6, 12708–12722**

**Benjamin T. Tuttle<sup>1</sup>, Sharolyn Anderson<sup>2</sup>, Chris Elvidge<sup>3</sup>, Tilottama Ghosh<sup>4</sup>, Kim Baugh<sup>4</sup> and Paul Sutton<sup>1,2,\*</sup>**

<sup>1</sup> Department of Geography and the Environment, University of Denver, Boettcher West, Room 120, 2050 E. Iliff Ave., Denver, CO 80208, USA; E-Mail: bentuttle.du@gmail.com

<sup>2</sup> School of the Natural and Built Environments, University of South Australia, GPO Box 2471 Adelaide, SA 5001, Australia; E-Mail: sharolyn.anderson@unisa.edu.au

<sup>3</sup> National Geophysical Data Center, 325 Broadway, E/GC2, Boulder, CO 80305, USA; E-Mail: Chris.Elvidge@noaa.gov

<sup>4</sup> University of Colorado, Boulder, Cooperative Institute for Research in Environmental Sciences, 325 Broadway, E/GC2, Boulder, CO 80305, USA; E-Mails: tilottama.ghosh@noaa.gov (T.G.); kim.baugh@noaa.gov (K.B.)

External Editors: Richard Müller and Prasad S. Thenkabail

\* Author to whom correspondence should be addressed; E-Mail: psutton@du.edu; Tel.: +1-303-503-1575; Fax: +1-303-871-2201.

---

## 1. Introduction

The following four figures (Figures S1–S4) each four pages long are the independent third-party testing reports as we received them. We removed the individual names but all data and the format is original. Thus, this representation preserves the original format. Independent Testing Labs (ITL) is an independent light testing laboratory that provides lighting manufacturers, designers, architects, the government and others an accurate, efficient and unbiased source of evaluation for virtually every type of lighting. In order to get an accurate characterization of the lights used in this research the lights were sent to ITL for independent testing. The results from ITL provided in this supplement provide a characterization of the directional output of the lights as well as the spectral signature.

Figure S1. Report Number: ITL74069.

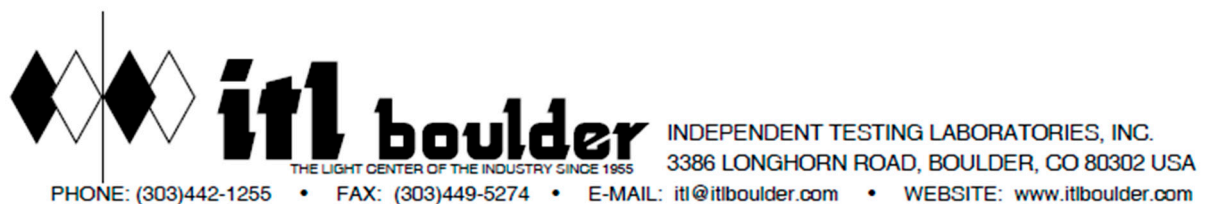

REPORT NUMBER: ITL74069

PAGE: 1 OF 4

ISSUE DATE: 09/28/12

PREPARED FOR: UNIVERSITY OF DENVER

CATALOG NUMBER: A

LUMINAIRE: CAST WHITE PAINTED METAL BALLAST HOUSING WITH FABRICATED WHITE PAINTED METAL ADJUSTABLE REFLECTOR/SOCKET MOUNTING PLATE, SPUN SEMI-SPECULAR METAL REFLECTOR, OPEN TOP. REFLECTOR MOUNT SET TO LOWEST POSITION.

LAMP: ONE 1000-WATT CLEAR E-25 HIGH PRESSURE SODIUM, SYLVANIA LU/1000/ECO, VERTICAL BASE-DOWN POSITION.

BALLAST: HOWARD LIGHTING PRODUCTS HAL220-1000-HPS-4T

NOTE: DATA SHOWN IS ABSOLUTE FOR THE SAMPLE PROVIDED AT RATED INPUT VOLTAGE (120VAC, 60Hz) TO THE BALLAST.

TOTAL INPUT WATTS = 1107.0 AT 120.0 VOLTS

TEST DISTANCE = 33.25 FEET

| DEG | CANDELA | LUMENS |
|-----|---------|--------|
| 0   | 0       |        |
| 5   | 0       | 0      |
| 15  | 0       | 0      |
| 25  | 0       | 0      |
| 35  | 0       | 0      |
| 45  | 0       | 0      |
| 55  | 0       | 0      |
| 65  | 0       | 0      |
| 75  | 0       | 0      |
| 85  | 48      | 93     |
| 90  | 431     |        |
| 95  | 1951    | 2225   |
| 105 | 5933    | 6385   |
| 115 | 12854   | 13133  |
| 125 | 25318   | 21612  |
| 135 | 28144   | 21793  |
| 145 | 32406   | 20355  |
| 155 | 37384   | 16963  |
| 165 | 18228   | 6360   |
| 175 | 31355   | 2502   |
| 180 | 62029   |        |

| ZONAL LUMEN SUMMARY |        |       |
|---------------------|--------|-------|
| ZONE                | LUMENS | %FIXT |
| 0- 30               | 0      | 0.0   |
| 0- 40               | 0      | 0.0   |
| 0- 60               | 0      | 0.0   |
| 0- 90               | 93     | 0.1   |
| 90-120              | 21744  | 19.5  |
| 90-130              | 43356  | 38.9  |
| 90-150              | 85504  | 76.7  |
| 90-180              | 111329 | 99.9  |
| 0-180               | 111423 | 100.0 |

EFFICACY = 100.7 lm/W

CIE TYPE - INDIRECT

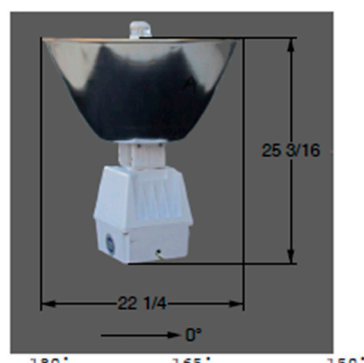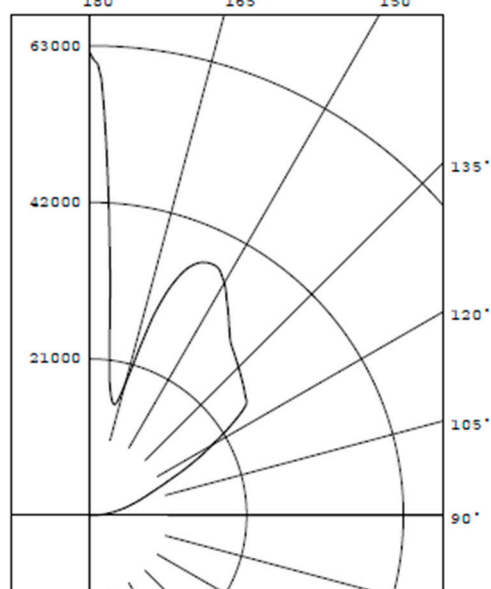

Figure S1. Cont.

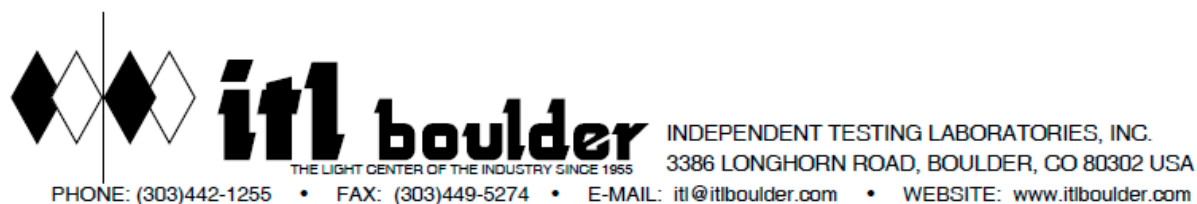

REPORT NUMBER: ITL74069

PAGE: 2 OF 4

ISSUE DATE: 09/28/12

PREPARED FOR: UNIVERSITY OF DENVER

## CANDELA DISTRIBUTION

|       |       |       |       |
|-------|-------|-------|-------|
| 0.0   | 0     | 160.5 | 32732 |
| 2.5   | 0     | 161.0 | 31761 |
| 5.0   | 0     | 161.5 | 30443 |
| 7.5   | 0     | 162.0 | 29241 |
| 10.0  | 0     | 162.5 | 27653 |
| 12.5  | 0     | 163.0 | 25448 |
| 15.0  | 0     | 163.5 | 23257 |
| 17.5  | 0     | 164.0 | 21161 |
| 20.0  | 0     | 164.5 | 19448 |
| 22.5  | 0     | 165.0 | 18228 |
| 25.0  | 0     | 165.5 | 17150 |
| 27.5  | 0     | 166.0 | 16286 |
| 30.0  | 0     | 166.5 | 15704 |
| 32.5  | 0     | 167.0 | 15388 |
| 35.0  | 0     | 167.5 | 15246 |
| 37.5  | 0     | 168.0 | 15273 |
| 40.0  | 0     | 168.5 | 15413 |
| 42.5  | 0     | 169.0 | 15622 |
| 45.0  | 0     | 169.5 | 15929 |
| 47.5  | 0     | 170.0 | 16259 |
| 50.0  | 0     | 170.5 | 16705 |
| 52.5  | 0     | 171.0 | 17294 |
| 55.0  | 0     | 171.5 | 17925 |
| 57.5  | 0     | 172.0 | 18766 |
| 60.0  | 0     | 172.5 | 20050 |
| 62.5  | 0     | 173.0 | 21573 |
| 65.0  | 0     | 173.5 | 23297 |
| 67.5  | 0     | 174.0 | 25325 |
| 70.0  | 0     | 174.5 | 28088 |
| 72.5  | 0     | 175.0 | 31355 |
| 75.0  | 0     | 175.5 | 34319 |
| 77.5  | 0     | 176.0 | 37670 |
| 80.0  | 0     | 176.5 | 41531 |
| 82.5  | 19    | 177.0 | 45485 |
| 85.0  | 48    | 177.5 | 49992 |
| 87.5  | 59    | 178.0 | 54591 |
| 90.0  | 431   | 178.5 | 58568 |
| 95.0  | 1951  | 179.0 | 60591 |
| 100.0 | 3839  | 179.5 | 61092 |
| 105.0 | 5933  | 180.0 | 62029 |
| 110.0 | 8492  |       |       |
| 115.0 | 12854 |       |       |
| 120.0 | 18937 |       |       |
| 125.0 | 25318 |       |       |
| 127.5 | 26262 |       |       |
| 130.0 | 26880 |       |       |
| 132.5 | 27492 |       |       |
| 135.0 | 28144 |       |       |
| 137.5 | 28839 |       |       |
| 140.0 | 29590 |       |       |
| 142.5 | 30747 |       |       |
| 145.0 | 32406 |       |       |
| 147.5 | 34164 |       |       |
| 150.0 | 36023 |       |       |
| 151.0 | 36598 |       |       |
| 152.0 | 37148 |       |       |
| 153.0 | 37450 |       |       |
| 154.0 | 37485 |       |       |
| 155.0 | 37384 |       |       |
| 156.0 | 37159 |       |       |
| 157.0 | 36735 |       |       |
| 158.0 | 36061 |       |       |
| 159.0 | 35023 |       |       |
| 160.0 | 33585 |       |       |

THIS REPORT IS BASED ON PUBLISHED INDUSTRY PROCEDURES. FIELD PERFORMANCE MAY DIFFER FROM LABORATORY PERFORMANCE.

Figure S1. Cont.

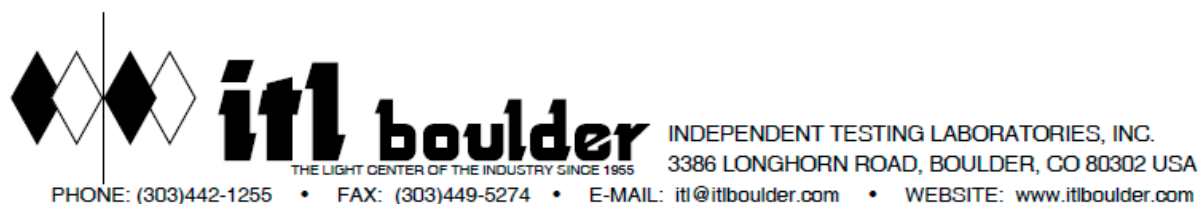

REPORT NUMBER: ITL74069

PAGE: 3 OF 4

ISSUE DATE: 09/28/12

PREPARED FOR: UNIVERSITY OF DENVER

| 5-DEGREE |       |         | 10-DEGREE |       |         |
|----------|-------|---------|-----------|-------|---------|
| ZONAL    | LUMEN | SUMMARY | ZONAL     | LUMEN | SUMMARY |
| 0- 5     |       | 0       | 0- 10     |       | 0       |
| 5- 10    |       | 0       | 0- 20     |       | 0       |
| 10- 15   |       | 0       | 0- 30     |       | 0       |
| 15- 20   |       | 0       | 0- 40     |       | 0       |
| 20- 25   |       | 0       | 0- 50     |       | 0       |
| 25- 30   |       | 0       | 0- 60     |       | 0       |
| 30- 35   |       | 0       | 0- 70     |       | 0       |
| 35- 40   |       | 0       | 0- 80     |       | 0       |
| 40- 45   |       | 0       | 0- 90     |       | 93      |
| 45- 50   |       | 0       | 0-100     |       | 2319    |
| 50- 55   |       | 0       | 0-110     |       | 8704    |
| 55- 60   |       | 0       | 0-120     |       | 21838   |
| 60- 65   |       | 0       | 0-130     |       | 43449   |
| 65- 70   |       | 0       | 0-140     |       | 65243   |
| 70- 75   |       | 0       | 0-150     |       | 85598   |
| 75- 80   |       | 0       | 0-160     |       | 102561  |
| 80- 85   |       | 12      | 0-170     |       | 108920  |
| 85- 90   |       | 82      | 0-180     |       | 111423  |
| 90- 95   |       | 652     |           |       |         |
| 95-100   |       | 1573    |           |       |         |
| 100-105  |       | 2615    |           |       |         |
| 105-110  |       | 3770    |           |       |         |
| 110-115  |       | 5405    |           |       |         |
| 115-120  |       | 7728    |           |       |         |
| 120-125  |       | 10229   |           |       |         |
| 125-130  |       | 11382   |           |       |         |
| 130-135  |       | 11112   |           |       |         |
| 135-140  |       | 10682   |           |       |         |
| 140-145  |       | 10295   |           |       |         |
| 145-150  |       | 10060   |           |       |         |
| 150-155  |       | 9379    |           |       |         |
| 155-160  |       | 7584    |           |       |         |
| 160-165  |       | 4465    |           |       |         |
| 165-170  |       | 1895    |           |       |         |
| 170-175  |       | 1467    |           |       |         |
| 175-180  |       | 1035    |           |       |         |

Figure S1. Cont.

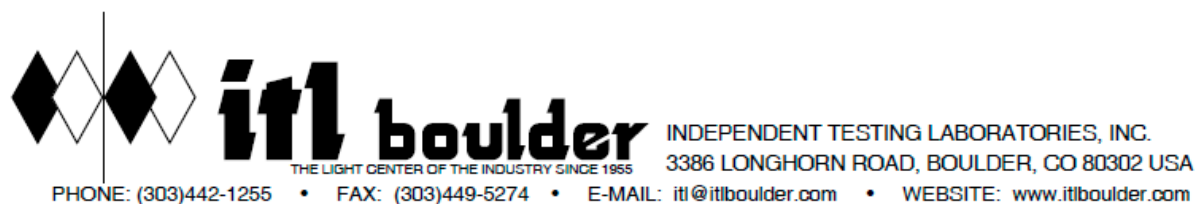

REPORT NUMBER: ITL74069

PAGE: 4 OF 4

ISSUE DATE: 09/28/12

PREPARED FOR: UNIVERSITY OF DENVER

## COEFFICIENTS OF UTILIZATION - ZONAL CAVITY METHOD

EFFECTIVE FLOOR CAVITY REFLECTANCE 0.20

| RC | 80 |    |    |    | 70 |    |    |    | 50 |    |    | 30 |    |    | 10 |    |    | 0 |
|----|----|----|----|----|----|----|----|----|----|----|----|----|----|----|----|----|----|---|
| RW | 70 | 50 | 30 | 10 | 70 | 50 | 30 | 10 | 50 | 30 | 10 | 50 | 30 | 10 | 50 | 30 | 10 | 0 |
| 0  | 95 | 95 | 95 | 95 | 81 | 81 | 81 | 81 | 56 | 56 | 56 | 32 | 32 | 32 | 10 | 10 | 10 | 0 |
| 1  | 87 | 83 | 79 | 76 | 74 | 71 | 68 | 65 | 48 | 47 | 45 | 28 | 27 | 26 | 9  | 9  | 8  | 0 |
| 2  | 79 | 72 | 66 | 62 | 67 | 62 | 57 | 53 | 42 | 40 | 37 | 24 | 23 | 22 | 8  | 7  | 7  | 0 |
| 3  | 72 | 63 | 56 | 51 | 61 | 54 | 49 | 44 | 37 | 34 | 31 | 21 | 20 | 18 | 7  | 6  | 6  | 0 |
| 4  | 65 | 56 | 48 | 43 | 56 | 48 | 42 | 37 | 33 | 29 | 26 | 19 | 17 | 16 | 6  | 6  | 5  | 0 |
| 5  | 60 | 49 | 42 | 36 | 51 | 42 | 36 | 32 | 29 | 25 | 22 | 17 | 15 | 13 | 5  | 5  | 4  | 0 |
| 6  | 55 | 44 | 36 | 31 | 47 | 38 | 32 | 27 | 26 | 22 | 19 | 15 | 13 | 11 | 5  | 4  | 4  | 0 |
| 7  | 50 | 39 | 32 | 27 | 43 | 34 | 28 | 23 | 23 | 19 | 17 | 14 | 11 | 10 | 4  | 4  | 3  | 0 |
| 8  | 47 | 35 | 28 | 23 | 40 | 30 | 24 | 20 | 21 | 17 | 14 | 12 | 10 | 9  | 4  | 3  | 3  | 0 |
| 9  | 43 | 32 | 25 | 20 | 37 | 27 | 22 | 18 | 19 | 15 | 13 | 11 | 9  | 8  | 4  | 3  | 3  | 0 |
| 10 | 40 | 29 | 22 | 18 | 34 | 25 | 19 | 16 | 17 | 14 | 11 | 10 | 8  | 7  | 3  | 3  | 2  | 0 |

ALL CANDELA, LUMENS, LUMINANCE, AND VCP VALUES IN THIS REPORT ARE BASED ON ABSOLUTE PHOTOMETRY. THE COEFFICIENT OF UTILIZATION VALUES ARE BASED ON THE TOTAL ABSOLUTE LUMEN OUTPUT OF THIS TEST SAMPLE.

Figure S2. Report Number: ITL74070.

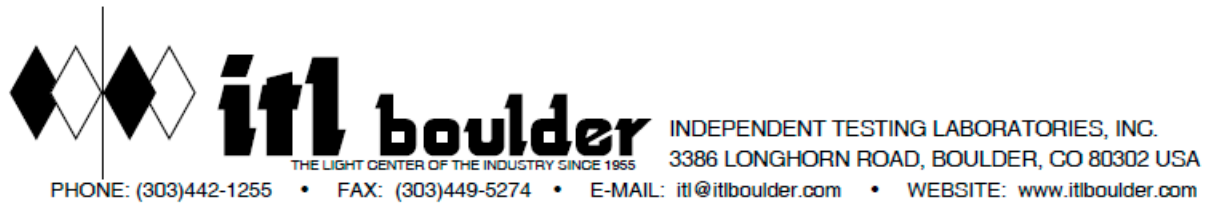

REPORT NUMBER: ITL74070

PAGE: 1 OF 4

ISSUE DATE: 09/28/12

PREPARED FOR: UNIVERSITY OF DENVER

CATALOG NUMBER: B

LUMINAIRE: CAST WHITE PAINTED METAL BALLAST HOUSING WITH FABRICATED WHITE PAINTED METAL ADJUSTABLE REFLECTOR/SOCKET MOUNTING PLATE, SPUN SEMI-SPECULAR METAL REFLECTOR, OPEN TOP. REFLECTOR MOUNT SET TO LOWEST POSITION.

LAMP: ONE 1000-WATT CLEAR E-25 HIGH PRESSURE SODIUM, SYLVANIA LU/1000/ECO, VERTICAL BASE-DOWN POSITION.

BALLAST: HOWARD LIGHTING PRODUCTS  
HAL220-1000-HPS-4T

NOTE: DATA SHOWN IS ABSOLUTE FOR THE SAMPLE PROVIDED AT RATED INPUT VOLTAGE (120VAC, 60Hz) TO THE BALLAST.

TOTAL INPUT WATTS = 1057.9 AT 120.0 VOLTS

TEST DISTANCE = 33.25 FEET

| DEG | CANDELA | LUMENS |
|-----|---------|--------|
| 0   | 0       |        |
| 5   | 0       | 0      |
| 15  | 0       | 0      |
| 25  | 0       | 0      |
| 35  | 0       | 0      |
| 45  | 0       | 0      |
| 55  | 0       | 0      |
| 65  | 0       | 0      |
| 75  | 1       | 4      |
| 85  | 74      | 142    |
| 90  | 601     |        |
| 95  | 2513    | 2682   |
| 105 | 6284    | 6792   |
| 115 | 13555   | 13716  |
| 125 | 23787   | 20602  |
| 135 | 26124   | 20220  |
| 145 | 29111   | 18370  |
| 155 | 31076   | 14224  |
| 165 | 15992   | 5149   |
| 175 | 18461   | 1682   |
| 180 | 39826   |        |

| ZONAL LUMEN SUMMARY |        |       |
|---------------------|--------|-------|
| ZONE                | LUMENS | %FIXT |
| 0- 30               | 0      | 0.0   |
| 0- 40               | 0      | 0.0   |
| 0- 60               | 0      | 0.0   |
| 0- 90               | 147    | 0.1   |
| 90-120              | 23190  | 22.4  |
| 90-130              | 43792  | 42.3  |
| 90-150              | 82381  | 79.5  |
| 90-180              | 103437 | 99.9  |
| 0-180               | 103584 | 100.0 |

EFFICACY = 97.9 lm/W

CIE TYPE - INDIRECT

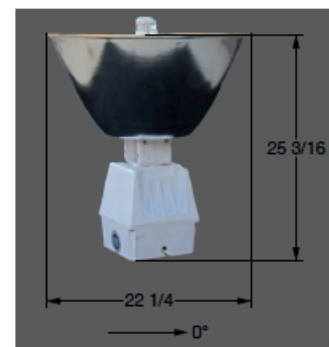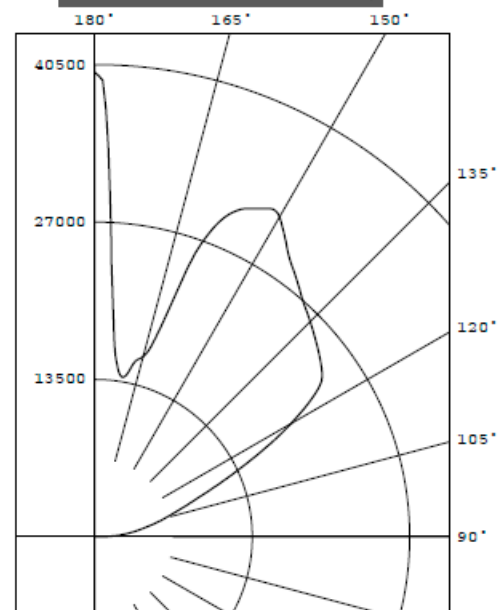



Figure S2. Cont.

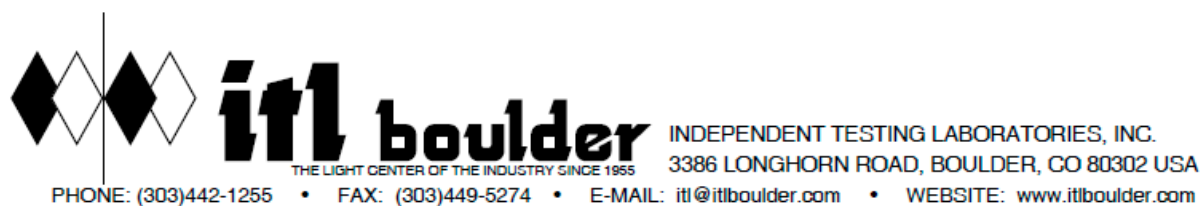

REPORT NUMBER: ITL74070

PAGE: 2 OF 4

ISSUE DATE: 09/28/12

PREPARED FOR: UNIVERSITY OF DENVER

## CANDELA DISTRIBUTION

|       |       |       |       |
|-------|-------|-------|-------|
| 0.0   | 0     | 160.5 | 25846 |
| 2.5   | 0     | 161.0 | 24342 |
| 5.0   | 0     | 161.5 | 22260 |
| 7.5   | 0     | 162.0 | 20453 |
| 10.0  | 0     | 162.5 | 19055 |
| 12.5  | 0     | 163.0 | 17855 |
| 15.0  | 0     | 163.5 | 17045 |
| 17.5  | 0     | 164.0 | 16547 |
| 20.0  | 0     | 164.5 | 16223 |
| 22.5  | 0     | 165.0 | 15992 |
| 25.0  | 0     | 165.5 | 15834 |
| 27.5  | 0     | 166.0 | 15723 |
| 30.0  | 0     | 166.5 | 15616 |
| 32.5  | 0     | 167.0 | 15469 |
| 35.0  | 0     | 167.5 | 15212 |
| 37.5  | 0     | 168.0 | 14798 |
| 40.0  | 0     | 168.5 | 14393 |
| 42.5  | 0     | 169.0 | 14137 |
| 45.0  | 0     | 169.5 | 13978 |
| 47.5  | 0     | 170.0 | 13895 |
| 50.0  | 0     | 170.5 | 13909 |
| 52.5  | 0     | 171.0 | 14030 |
| 55.0  | 0     | 171.5 | 14186 |
| 57.5  | 0     | 172.0 | 14424 |
| 60.0  | 0     | 172.5 | 14784 |
| 62.5  | 0     | 173.0 | 15158 |
| 65.0  | 0     | 173.5 | 15639 |
| 67.5  | 0     | 174.0 | 16285 |
| 70.0  | 0     | 174.5 | 17198 |
| 72.5  | 0     | 175.0 | 18461 |
| 75.0  | 1     | 175.5 | 19810 |
| 77.5  | 4     | 176.0 | 21513 |
| 80.0  | 22    | 176.5 | 23493 |
| 82.5  | 54    | 177.0 | 26450 |
| 85.0  | 74    | 177.5 | 29690 |
| 87.5  | 81    | 178.0 | 33273 |
| 90.0  | 601   | 178.5 | 36641 |
| 95.0  | 2513  | 179.0 | 39154 |
| 100.0 | 4218  | 179.5 | 39538 |
| 105.0 | 6284  | 180.0 | 39826 |
| 110.0 | 8951  |       |       |
| 115.0 | 13555 |       |       |
| 120.0 | 19425 |       |       |
| 125.0 | 23787 |       |       |
| 127.5 | 24434 |       |       |
| 130.0 | 24990 |       |       |
| 132.5 | 25542 |       |       |
| 135.0 | 26124 |       |       |
| 137.5 | 26694 |       |       |
| 140.0 | 27421 |       |       |
| 142.5 | 28255 |       |       |
| 145.0 | 29111 |       |       |
| 147.5 | 30377 |       |       |
| 150.0 | 31691 |       |       |
| 151.0 | 31972 |       |       |
| 152.0 | 31904 |       |       |
| 153.0 | 31586 |       |       |
| 154.0 | 31306 |       |       |
| 155.0 | 31076 |       |       |
| 156.0 | 30739 |       |       |
| 157.0 | 30219 |       |       |
| 158.0 | 29513 |       |       |
| 159.0 | 28377 |       |       |
| 160.0 | 26865 |       |       |

THIS REPORT IS BASED ON PUBLISHED INDUSTRY PROCEDURES. FIELD PERFORMANCE MAY DIFFER FROM LABORATORY PERFORMANCE.

Figure S2. Cont.

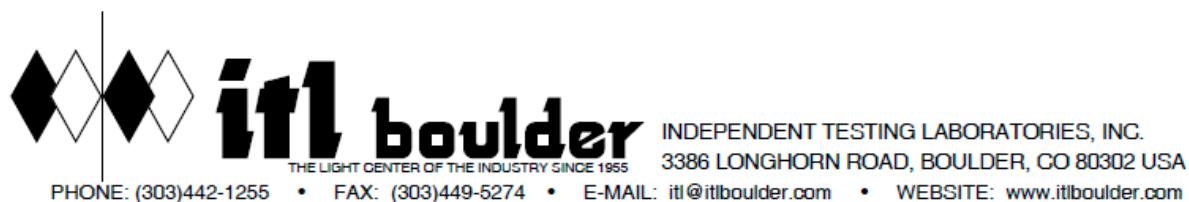

REPORT NUMBER: ITL74070

PAGE: 4 OF 4

ISSUE DATE: 09/28/12

PREPARED FOR: UNIVERSITY OF DENVER

## COEFFICIENTS OF UTILIZATION - ZONAL CAVITY METHOD

EFFECTIVE FLOOR CAVITY REFLECTANCE 0.20

| RC | 80 |    |    |    | 70 |    |    |    | 50 |    |    | 30 |    |    | 10 |    |    | 0 |
|----|----|----|----|----|----|----|----|----|----|----|----|----|----|----|----|----|----|---|
| RW | 70 | 50 | 30 | 10 | 70 | 50 | 30 | 10 | 50 | 30 | 10 | 50 | 30 | 10 | 50 | 30 | 10 | 0 |
| 0  | 95 | 95 | 95 | 95 | 81 | 81 | 81 | 81 | 56 | 56 | 56 | 32 | 32 | 32 | 10 | 10 | 10 | 0 |
| 1  | 87 | 83 | 79 | 76 | 74 | 71 | 68 | 65 | 48 | 47 | 45 | 28 | 27 | 26 | 9  | 9  | 8  | 0 |
| 2  | 79 | 72 | 66 | 62 | 67 | 62 | 57 | 53 | 42 | 40 | 37 | 24 | 23 | 22 | 8  | 7  | 7  | 0 |
| 3  | 72 | 63 | 56 | 51 | 61 | 54 | 49 | 44 | 37 | 34 | 31 | 21 | 20 | 18 | 7  | 6  | 6  | 0 |
| 4  | 65 | 56 | 48 | 43 | 56 | 48 | 42 | 37 | 33 | 29 | 26 | 19 | 17 | 16 | 6  | 6  | 5  | 0 |
| 5  | 60 | 49 | 42 | 36 | 51 | 42 | 36 | 32 | 29 | 25 | 22 | 17 | 15 | 13 | 5  | 5  | 4  | 0 |
| 6  | 55 | 44 | 36 | 31 | 47 | 38 | 32 | 27 | 26 | 22 | 19 | 15 | 13 | 11 | 5  | 4  | 4  | 0 |
| 7  | 50 | 39 | 32 | 27 | 43 | 34 | 28 | 23 | 23 | 19 | 17 | 14 | 11 | 10 | 4  | 4  | 3  | 0 |
| 8  | 47 | 35 | 28 | 23 | 40 | 30 | 24 | 20 | 21 | 17 | 14 | 12 | 10 | 9  | 4  | 3  | 3  | 0 |
| 9  | 43 | 32 | 25 | 20 | 37 | 27 | 22 | 18 | 19 | 15 | 13 | 11 | 9  | 8  | 4  | 3  | 3  | 0 |
| 10 | 40 | 29 | 22 | 18 | 34 | 25 | 19 | 16 | 17 | 14 | 11 | 10 | 8  | 7  | 3  | 3  | 2  | 0 |

ALL CANDELA, LUMENS, LUMINANCE, AND VCP VALUES IN THIS REPORT ARE BASED ON ABSOLUTE PHOTOMETRY. THE COEFFICIENT OF UTILIZATION VALUES ARE BASED ON THE TOTAL ABSOLUTE LUMEN OUTPUT OF THIS TEST SAMPLE.



Figure S2. Cont.

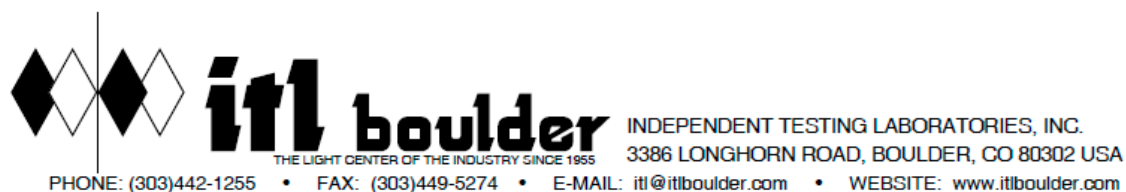

REPORT NUMBER: ITL74070  
 ISSUE DATE: 09/28/12  
 PREPARED FOR: UNIVERSITY OF DENVER

PAGE: 3 OF 4

| 5-DEGREE |       |         | 10-DEGREE |       |         |
|----------|-------|---------|-----------|-------|---------|
| ZONAL    | LUMEN | SUMMARY | ZONAL     | LUMEN | SUMMARY |
| 0- 5     |       | 0       | 0- 10     |       | 0       |
| 5- 10    |       | 0       | 0- 20     |       | 0       |
| 10- 15   |       | 0       | 0- 30     |       | 0       |
| 15- 20   |       | 0       | 0- 40     |       | 0       |
| 20- 25   |       | 0       | 0- 50     |       | 0       |
| 25- 30   |       | 0       | 0- 60     |       | 0       |
| 30- 35   |       | 0       | 0- 70     |       | 0       |
| 35- 40   |       | 0       | 0- 80     |       | 4       |
| 40- 45   |       | 0       | 0- 90     |       | 147     |
| 45- 50   |       | 0       | 0-100     |       | 2828    |
| 50- 55   |       | 0       | 0-110     |       | 9621    |
| 55- 60   |       | 0       | 0-120     |       | 23337   |
| 60- 65   |       | 0       | 0-130     |       | 43938   |
| 65- 70   |       | 0       | 0-140     |       | 64158   |
| 70- 75   |       | 0       | 0-150     |       | 82528   |
| 75- 80   |       | 4       | 0-160     |       | 96752   |
| 80- 85   |       | 28      | 0-170     |       | 101902  |
| 85- 90   |       | 115     | 0-180     |       | 103584  |
| 90- 95   |       | 853     |           |       |         |
| 95-100   |       | 1829    |           |       |         |
| 100-105  |       | 2810    |           |       |         |
| 105-110  |       | 3982    |           |       |         |
| 110-115  |       | 5699    |           |       |         |
| 115-120  |       | 8018    |           |       |         |
| 120-125  |       | 9988    |           |       |         |
| 125-130  |       | 10613   |           |       |         |
| 130-135  |       | 10323   |           |       |         |
| 135-140  |       | 9897    |           |       |         |
| 140-145  |       | 9426    |           |       |         |
| 145-150  |       | 8943    |           |       |         |
| 150-155  |       | 8009    |           |       |         |
| 155-160  |       | 6216    |           |       |         |
| 160-165  |       | 3359    |           |       |         |
| 165-170  |       | 1790    |           |       |         |
| 170-175  |       | 1070    |           |       |         |
| 175-180  |       | 612     |           |       |         |

THIS REPORT IS BASED ON PUBLISHED INDUSTRY PROCEDURES. FIELD PERFORMANCE MAY DIFFER FROM LABORATORY PERFORMANCE.

Figure S3. Report Number: ITL74071.



**itl boulder** INDEPENDENT TESTING LABORATORIES, INC.  
THE LIGHT CENTER OF THE INDUSTRY SINCE 1955 3386 LONGHORN ROAD, BOULDER, CO 80302 USA

PHONE: (303)442-1255 • FAX: (303)449-5274 • E-MAIL: [itl@itlboulder.com](mailto:itl@itlboulder.com) • WEBSITE: [www.itlboulder.com](http://www.itlboulder.com)  
 REPORT NUMBER: ITL74071 Page 1 of 4  
 DATE: 11/14/12  
 PREPARED FOR: UNIVERSITY OF DENVER  
 CATALOG NUMBER: A

**LUMINAIRE:** CAST WHITE PAINTED METAL BALLAST HOUSING WITH FABRICATED WHITE PAINTED METAL ADJUSTABLE REFLECTOR/SOCKET MOUNTING PLATE, SPUN SEMI-SPECULAR METAL REFLECTOR, OPEN TOP. REFLECTOR MOUNT SET TO LOWEST POSITION.

**LAMP:** ONE 1000-WATT CLEAR E-25 HIGH PRESSURE SODIUM, SYLVANIA LU/1000/ECO, VERTICAL BASE-DOWN POSITION.

**BALLAST:** HOWARD LIGHTING PRODUCTS HAL220-1000-HPS-4T

**NOTE:** DATA SHOWN IS ABSOLUTE FOR THE SAMPLE PROVIDED AT RATED INPUT VOLTAGE (120VAC, 60Hz) TO THE BALLAST.

**INSTRUMENTS:** Associated Power Technologies APT6040 AC Power Source Calibration Due: N/A  
 Yokogawa WT210 Digital Power Meter #8 01/26/13  
 Ocean Optics QE65000 Spectroradiometer 06/05/13  
 ITL 2.0 meter Diameter Integrating Sphere, 4PI Geometry 06/05/13

**OBJECT OF TEST:** Measure the Spectral Power Distribution (SPD), Correlated Color Temperature (CCT), Color Rendering Indices (CRI<sub>a</sub>,1-14), Chromaticity Coordinates (x,y) and electrical data including ANSI C82.77-2002 Power Factor (PF) to the test sample. Calculate the photometric candela to normalized Operational Linescan System (OLS) radiometer intensity ratio.

**PROCEDURE:** The test sample was provided by the customer and had an unknown number of burn hours. The test sample was mounted inside the integrating sphere and allowed to stabilize. After stabilization occurred, measurements were taken. In order to measure mean performance, multiple data sets were recorded and averaged. Readings were taken with the test sample operating at 120VAC input in a 25 +/-1 degree Celsius free air ambient and in accordance with IESNA LM-51. All data are traceable to the National Institute of Standards and Technology.

**RESULTS:** (continued subsequent pages)

Figure S3. Cont.



**itl boulder** INDEPENDENT TESTING LABORATORIES, INC.  
THE LIGHT CENTER OF THE INDUSTRY SINCE 1955 3386 LONGHORN ROAD, BOULDER, CO 80302 USA

PHONE: (303)442-1255 • FAX: (303)449-5274 • E-MAIL: [itl@itlboulder.com](mailto:itl@itlboulder.com) • WEBSITE: [www.itlboulder.com](http://www.itlboulder.com)  
 REPORT NUMBER: ITL74071  
 DATE: 11/14/12  
 PREPARED FOR: UNIVERSITY OF DENVER  
 CATALOG NUMBER: A

Page 2 of 4

## RESULTS :

| SPECTORADIOMETRIC                                      |                   |
|--------------------------------------------------------|-------------------|
| Observer                                               | CIE 1931 2 degree |
| Chromaticity Ordinate x                                | 0.5205            |
| Chromaticity Ordinate y                                | 0.4175            |
| Correlated Color Temp CCT (K)                          | 2078              |
| Color Rendering Index (CRIa)                           | 34                |
| Color Rendering Index 1 (Light greyish red)            | 26                |
| Color Rendering Index 2 (Dark greyish yellow)          | 69                |
| Color Rendering Index 3 (Strong yellowish green)       | 63                |
| Color Rendering Index 4 (Moderate yellowish green)     | 9                 |
| Color Rendering Index 5 (Light bluish green)           | 25                |
| Color Rendering Index 6 (Light blue)                   | 62                |
| Color Rendering Index 7 (Light violet)                 | 45                |
| Color Rendering Index 8 (Light reddish purple)         | -27               |
| Color Rendering Index 9 (Strong red)                   | -154              |
| Color Rendering Index 10 (Strong yellow)               | 50                |
| Color Rendering Index 11 (Strong green)                | -15               |
| Color Rendering Index 12 (Strong blue)                 | 41                |
| Color Rendering Index 13 (Light yellowish pink (skin)) | 29                |
| Color Rendering Index 14 (Moderate olive green (leaf)) | 76                |
| Photometric lumen to normalized OLS intensity ratio    | 0.00291           |
| ELECTRICAL FOR SPECTORADIOMETRIC TEST                  |                   |
| Input Voltage (Volts AC )                              | 120.0             |
| Input Current (Amps AC )                               | 10.10             |
| Input Power (Watts)                                    | 1106.9            |
| Input Power Factor (%)                                 | 91.3              |

Figure S3. Cont.



**itl boulder** INDEPENDENT TESTING LABORATORIES, INC.  
THE LIGHT CENTER OF THE INDUSTRY SINCE 1955 3386 LONGHORN ROAD, BOULDER, CO 80302 USA

PHONE: (303)442-1255 • FAX: (303)449-5274 • E-MAIL: [itl@itlboulder.com](mailto:itl@itlboulder.com) • WEBSITE: [www.itlboulder.com](http://www.itlboulder.com)

REPORT NUMBER: ITL74071  
 DATE: 11/14/12  
 PREPARED FOR: UNIVERSITY OF DENVER  
 CATALOG NUMBER: A

Page 3 of 4

## RESULTS:

| Wavelength | mW per nm | Wavelength | mW per nm | Wavelength | mW per nm |
|------------|-----------|------------|-----------|------------|-----------|
| 380        | 58.808    | 605        | 3557.948  | 830        | 480.518   |
| 385        | 57.434    | 610        | 2666.682  | 835        | 577.950   |
| 390        | 65.498    | 615        | 3072.950  | 840        | 1268.945  |
| 395        | 83.139    | 620        | 1688.795  | 845        | 7073.105  |
| 400        | 101.541   | 625        | 1404.709  | 850        | 4498.356  |
| 405        | 127.360   | 630        | 1209.094  | 855        | 834.633   |
| 410        | 123.425   | 635        | 1063.139  | 860        | 427.129   |
| 415        | 114.889   | 640        | 950.761   | 865        | 277.804   |
| 420        | 117.473   | 645        | 858.767   | 870        | 197.682   |
| 425        | 124.329   | 650        | 777.087   | 875        | 160.194   |
| 430        | 132.454   | 655        | 743.258   | 880        | 136.556   |
| 435        | 158.632   | 660        | 688.853   | 885        | 126.379   |
| 440        | 194.506   | 665        | 627.004   | 890        | 119.475   |
| 445        | 122.045   | 670        | 686.924   | 895        | 113.690   |
| 450        | 340.711   | 675        | 673.374   | 900        | 118.380   |
| 455        | 193.647   | 680        | 557.816   | 905        | 119.423   |
| 460        | 112.166   | 685        | 442.165   | 910        | 100.878   |
| 465        | 312.437   | 690        | 374.880   | 915        | 100.049   |
| 470        | 350.623   | 695        | 343.467   | 920        | 101.557   |
| 475        | 273.605   | 700        | 326.064   | 925        | 102.473   |
| 480        | 74.893    | 705        | 313.162   | 930        | 101.001   |
| 485        | 83.327    | 710        | 302.515   | 935        | 97.563    |
| 490        | 127.136   | 715        | 292.795   | 940        | 92.603    |
| 495        | 246.996   | 720        | 283.732   | 945        | 86.270    |
| 500        | 1680.222  | 725        | 276.737   | 950        | 79.362    |
| 505        | 138.016   | 730        | 270.241   | 955        | 74.128    |
| 510        | 112.133   | 735        | 265.158   | 960        | 70.445    |
| 515        | 616.730   | 740        | 267.383   | 965        | 67.729    |
| 520        | 115.544   | 745        | 262.957   | 970        | 65.998    |
| 525        | 117.350   | 750        | 263.668   | 975        | 63.022    |
| 530        | 123.035   | 755        | 294.771   | 980        | 60.419    |
| 535        | 131.591   | 760        | 262.640   | 985        | 59.205    |
| 540        | 150.926   | 765        | 258.310   | 990        | 58.747    |
| 545        | 215.037   | 770        | 469.188   | 995        | 59.756    |
| 550        | 679.972   | 775        | 440.397   | 1000       | 60.573    |
| 555        | 864.505   | 780        | 303.240   | 1005       | 63.602    |
| 560        | 952.237   | 785        | 485.626   | 1010       | 68.308    |
| 565        | 1486.730  | 790        | 352.479   | 1015       | 69.545    |
| 570        | 5778.590  | 795        | 261.400   | 1020       | 64.457    |
| 575        | 2508.055  | 800        | 272.785   | 1025       | 59.647    |
| 580        | 3938.879  | 805        | 279.603   | 1030       | 57.876    |
| 585        | 3458.626  | 810        | 305.002   | 1035       | 54.132    |
| 590        | 128.260   | 815        | 339.748   | 1040       | 49.850    |
| 595        | 3886.452  | 820        | 389.200   | 1045       | 47.093    |
| 600        | 4630.139  | 825        | 444.187   | 1050       | 46.365    |

Figure S3. Cont.

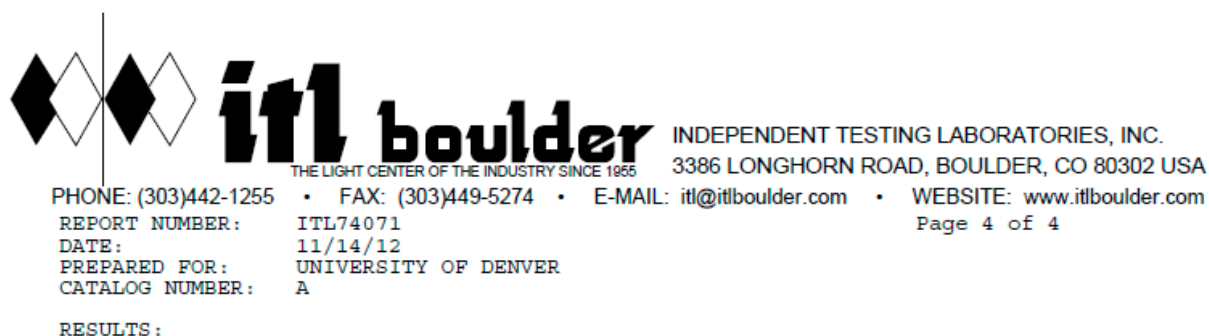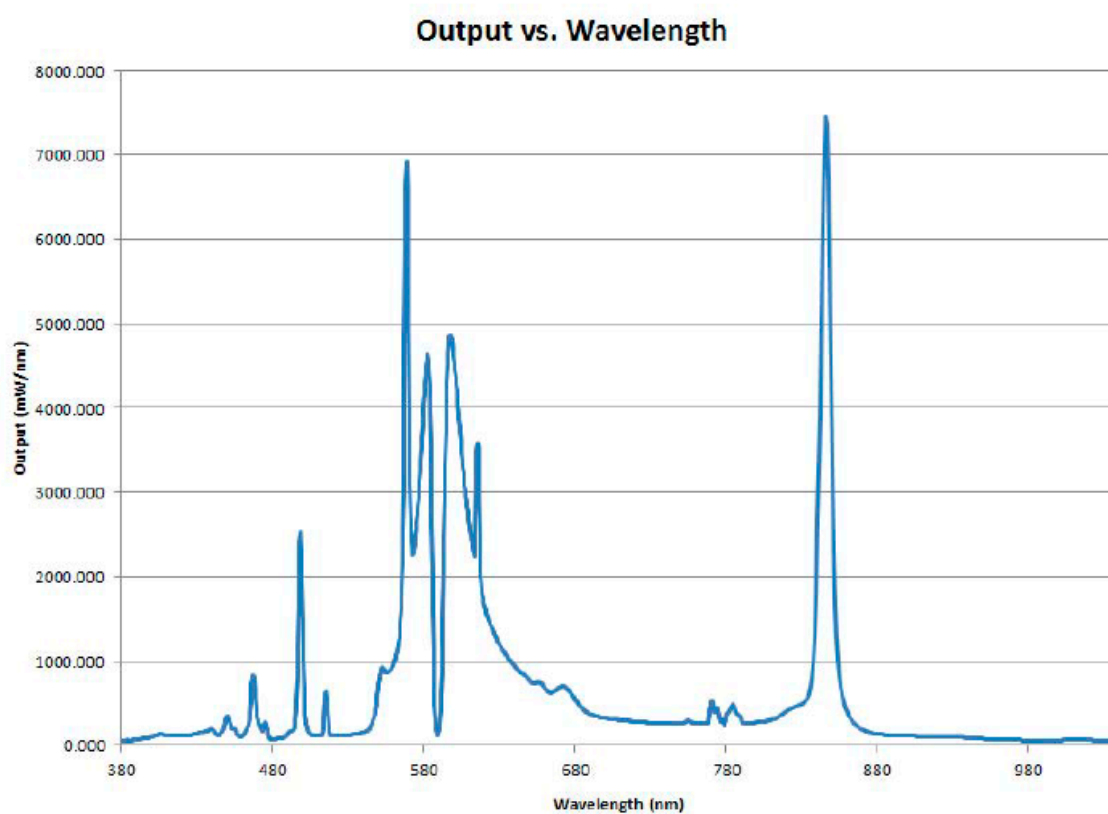

Figure S4. Report Number: ITL74072.



**itl boulder** INDEPENDENT TESTING LABORATORIES, INC.  
THE LIGHT CENTER OF THE INDUSTRY SINCE 1955 3386 LONGHORN ROAD, BOULDER, CO 80302 USA

PHONE: (303)442-1255 • FAX: (303)449-5274 • E-MAIL: [itl@itlboulder.com](mailto:itl@itlboulder.com) • WEBSITE: [www.itlboulder.com](http://www.itlboulder.com)  
 REPORT NUMBER: ITL74072 Page 1 of 4  
 DATE: 11/15/12  
 PREPARED FOR: UNIVERSITY OF DENVER  
 CATALOG NUMBER: B

**LUMINAIRE:** CAST WHITE PAINTED METAL BALLAST HOUSING WITH FABRICATED WHITE PAINTED METAL ADJUSTABLE REFLECTOR/SOCKET MOUNTING PLATE, SPUN SEMI-SPECULAR METAL REFLECTOR, OPEN TOP. REFLECTOR MOUNT SET TO LOWEST POSITION.

**LAMP:** ONE 1000-WATT CLEAR E-25 HIGH PRESSURE SODIUM, SYLVANIA LU/1000/ECO, VERTICAL BASE-DOWN POSITION.

**BALLAST:** HOWARD LIGHTING PRODUCTS HAL220-1000-HPS-4T

**NOTE:** DATA SHOWN IS ABSOLUTE FOR THE SAMPLE PROVIDED AT RATED INPUT VOLTAGE (120VAC, 60Hz) TO THE BALLAST.

|                     |                                                         |                      |
|---------------------|---------------------------------------------------------|----------------------|
| <b>INSTRUMENTS:</b> | Associated Power Technologies APT6040 AC Power Source   | Calibration Due: N/A |
|                     | Yokogawa WT210 Digital Power Meter #8                   | 01/26/13             |
|                     | Ocean Optics QE65000 Spectroradiometer                  | 06/05/13             |
|                     | ITL 2.0 meter Diameter Integrating Sphere, 4PI Geometry | 06/05/13             |

**OBJECT OF TEST:** Measure the Spectral Power Distribution (SPD), Correlated Color Temperature (CCT), Color Rendering Indices (CRIa,1-14), Chromaticity Coordinates (x,y), and electrical data including ANSI C82.77-2002 Power Factor (PF) to the test sample. Calculate the photometric candela to normalized Operational Linescan System (OLS) radiometer intensity ratio.

**PROCEDURE:** The test sample was provided by the customer and had an unknown number of burn hours. The test sample was mounted inside the integrating sphere and allowed to stabilize. After stabilization occurred, measurements were taken. In order to measure mean performance, multiple data sets were recorded and averaged. Readings were taken with the test sample operating at 120VAC input in a 25 +/-1 degree Celsius free air ambient and in accordance with IESNA LM-51. All data are traceable to the National Institute of Standards and Technology.

**RESULTS:** (continued subsequent pages)

Figure S4. Cont.

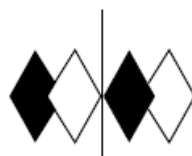

**itl boulder**  
THE LIGHT CENTER OF THE INDUSTRY SINCE 1955

INDEPENDENT TESTING LABORATORIES, INC.  
3386 LONGHORN ROAD, BOULDER, CO 80302 USA

PHONE: (303)442-1255 • FAX: (303)449-5274 • E-MAIL: [itl@itlboulder.com](mailto:itl@itlboulder.com) • WEBSITE: [www.itlboulder.com](http://www.itlboulder.com)  
REPORT NUMBER: ITL74072  
DATE: 11/15/12  
PREPARED FOR: UNIVERSITY OF DENVER  
CATALOG NUMBER: B

Page 2 of 4

## RESULTS:

| SPECTORADIOMETRIC                                      |                   |
|--------------------------------------------------------|-------------------|
| Observer                                               | CIE 1931 2 degree |
| Chromaticity Ordinate x                                | 0.5200            |
| Chromaticity Ordinate y                                | 0.4179            |
| Correlated Color Temp CCT (K)                          | 2085              |
| Color Rendering Index (CRIa)                           | 38                |
| Color Rendering Index 1 (Light greyish red)            | 31                |
| Color Rendering Index 2 (Dark greyish yellow)          | 70                |
| Color Rendering Index 3 (Strong yellowish green)       | 67                |
| Color Rendering Index 4 (Moderate yellowish green)     | 14                |
| Color Rendering Index 5 (Light bluish green)           | 29                |
| Color Rendering Index 6 (Light blue)                   | 62                |
| Color Rendering Index 7 (Light violet)                 | 49                |
| Color Rendering Index 8 (Light reddish purple)         | -18               |
| Color Rendering Index 9 (Strong red)                   | -134              |
| Color Rendering Index 10 (Strong yellow)               | 51                |
| Color Rendering Index 11 (Strong green)                | -10               |
| Color Rendering Index 12 (Strong blue)                 | 42                |
| Color Rendering Index 13 (Light yellowish pink (skin)) | 33                |
| Color Rendering Index 14 (Moderate olive green (leaf)) | 79                |
| Photometric lumen to normalized OLS intensity ratio    | 0.00299           |
| ELECTRICAL FOR SPECTORADIOMETRIC TEST                  |                   |
| Input Voltage (Volts AC )                              | 120.0             |
| Input Current (Amps AC )                               | 9.85              |
| Input Power (Watts)                                    | 1056.1            |
| Input Power Factor (%)                                 | 89.3              |



Figure S4. Cont.



**itl boulder** INDEPENDENT TESTING LABORATORIES, INC.  
THE LIGHT CENTER OF THE INDUSTRY SINCE 1955 3386 LONGHORN ROAD, BOULDER, CO 80302 USA

PHONE: (303)442-1255 • FAX: (303)449-5274 • E-MAIL: [itl@itlboulder.com](mailto:itl@itlboulder.com) • WEBSITE: [www.itlboulder.com](http://www.itlboulder.com)  
 REPORT NUMBER: ITL74072  
 DATE: 11/15/12  
 PREPARED FOR: UNIVERSITY OF DENVER  
 CATALOG NUMBER: B

Page 3 of 4

## RESULTS:

| Wavelength | mW per nm | Wavelength | mW per nm | Wavelength | mW per nm |
|------------|-----------|------------|-----------|------------|-----------|
| 380        | 48.506    | 605        | 3434.076  | 830        | 453.219   |
| 385        | 51.517    | 610        | 2653.586  | 835        | 545.979   |
| 390        | 66.810    | 615        | 3062.273  | 840        | 1199.618  |
| 395        | 84.208    | 620        | 1732.906  | 845        | 6578.988  |
| 400        | 98.854    | 625        | 1458.068  | 850        | 4189.511  |
| 405        | 121.732   | 630        | 1264.676  | 855        | 803.190   |
| 410        | 115.610   | 635        | 1118.814  | 860        | 399.355   |
| 415        | 107.364   | 640        | 1002.590  | 865        | 266.337   |
| 420        | 111.182   | 645        | 908.028   | 870        | 189.416   |
| 425        | 116.194   | 650        | 820.613   | 875        | 151.506   |
| 430        | 124.119   | 655        | 786.682   | 880        | 128.354   |
| 435        | 149.184   | 660        | 725.526   | 885        | 118.704   |
| 440        | 181.035   | 665        | 662.231   | 890        | 113.332   |
| 445        | 116.391   | 670        | 722.279   | 895        | 107.399   |
| 450        | 320.553   | 675        | 704.863   | 900        | 111.956   |
| 455        | 185.151   | 680        | 585.128   | 905        | 110.552   |
| 460        | 110.078   | 685        | 466.818   | 910        | 95.688    |
| 465        | 299.628   | 690        | 397.941   | 915        | 94.629    |
| 470        | 321.844   | 695        | 367.181   | 920        | 97.743    |
| 475        | 257.147   | 700        | 350.059   | 925        | 98.632    |
| 480        | 77.252    | 705        | 338.091   | 930        | 95.579    |
| 485        | 85.940    | 710        | 327.506   | 935        | 93.483    |
| 490        | 126.291   | 715        | 318.652   | 940        | 87.581    |
| 495        | 237.079   | 720        | 309.201   | 945        | 81.006    |
| 500        | 1425.320  | 725        | 302.892   | 950        | 74.929    |
| 505        | 137.004   | 730        | 295.716   | 955        | 70.143    |
| 510        | 117.193   | 735        | 289.825   | 960        | 66.535    |
| 515        | 575.197   | 740        | 291.772   | 965        | 63.983    |
| 520        | 121.695   | 745        | 285.330   | 970        | 62.393    |
| 525        | 124.796   | 750        | 285.063   | 975        | 59.483    |
| 530        | 130.103   | 755        | 310.891   | 980        | 56.545    |
| 535        | 139.045   | 760        | 280.577   | 985        | 55.572    |
| 540        | 159.455   | 765        | 274.979   | 990        | 55.037    |
| 545        | 227.280   | 770        | 486.550   | 995        | 56.666    |
| 550        | 733.475   | 775        | 444.570   | 1000       | 56.331    |
| 555        | 910.692   | 780        | 306.243   | 1005       | 59.682    |
| 560        | 1008.254  | 785        | 460.644   | 1010       | 64.802    |
| 565        | 1520.592  | 790        | 333.385   | 1015       | 65.368    |
| 570        | 5039.092  | 795        | 251.584   | 1020       | 61.762    |
| 575        | 2541.090  | 800        | 254.734   | 1025       | 56.634    |
| 580        | 3768.274  | 805        | 269.192   | 1030       | 54.740    |
| 585        | 2534.603  | 810        | 287.082   | 1035       | 52.092    |
| 590        | 103.033   | 815        | 321.582   | 1040       | 46.608    |
| 595        | 3057.483  | 820        | 367.791   | 1045       | 45.149    |
| 600        | 4226.539  | 825        | 421.800   | 1050       | 44.023    |

THIS REPORT IS BASED ON PUBLISHED INDUSTRY PROCEDURES. FIELD PERFORMANCE MAY DIFFER FROM LABORATORY PERFORMANCE.

Figure S4. Cont.

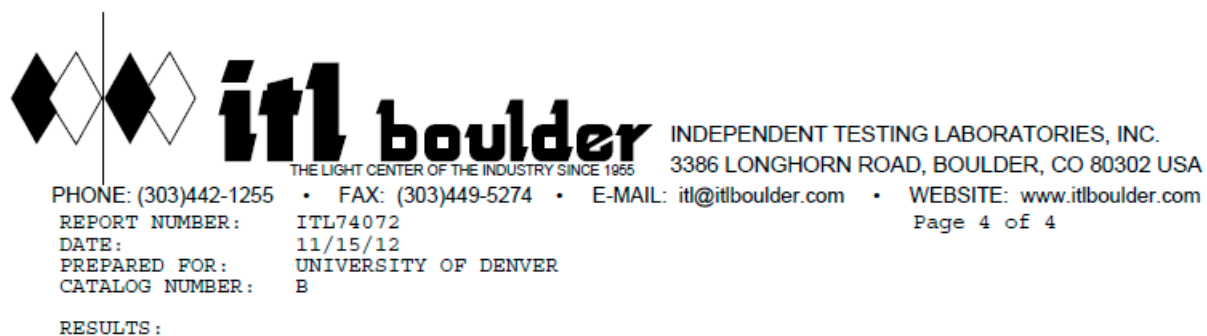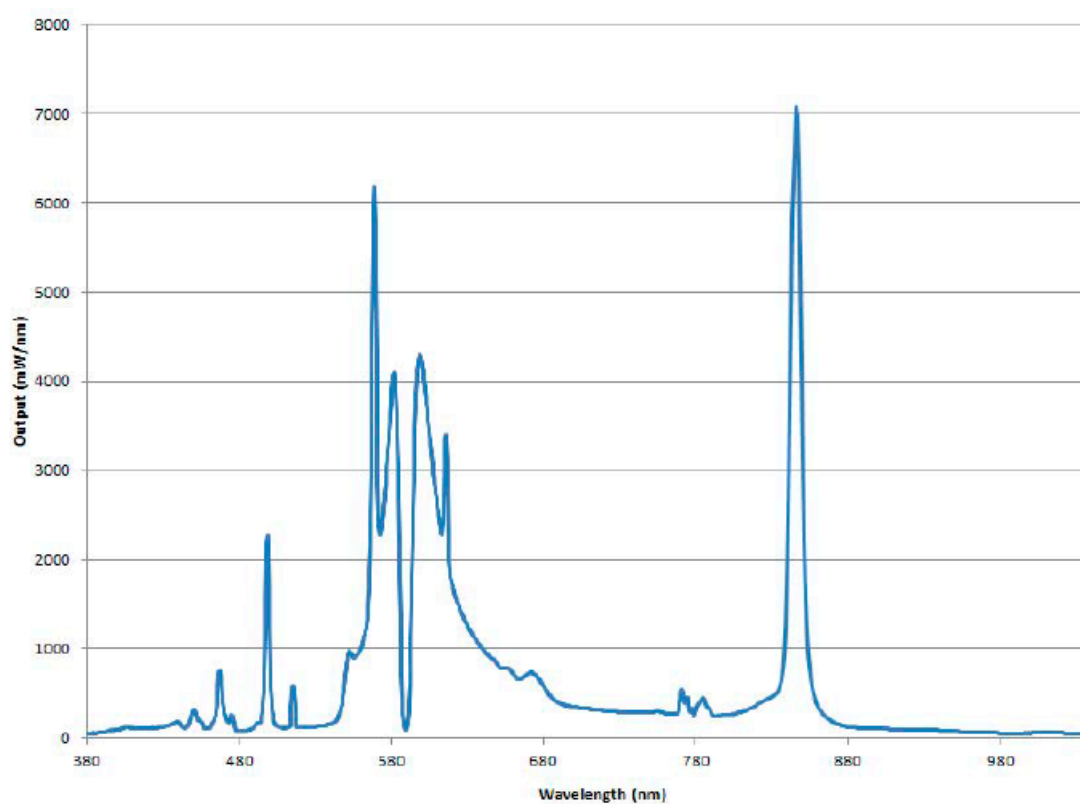

## **Acknowledgments**

This research was funded in part by and NASA Earth Space Science Fellowship and an ASPRS Rocky Mountain Region Scholarship. Finally, this research could not have been completed without the cooperation and assistance of the Air Force Weather Agency, National Oceanic and Atmospheric Administration, and Nation Geophysical Data Center.

© 2014 by the authors; licensee MDPI, Basel, Switzerland. This article is an open access article distributed under the terms and conditions of the Creative Commons Attribution license (<http://creativecommons.org/licenses/by/4.0/>).
